# Supplementary material for: Nodal β spectrins are required to maintain Na+ channel clustering and axon integrity
Source: eLife. 2020 Feb 13;9:e52378. doi: 10.7554/eLife.52378 (PMC7018506; doi:10.7554/eLife.52378)
Supplement: Figure 1—source data 1. [file elife-52378-fig1-data1.xlsx]

## Sheet: F1A
Figure 1A. Original immunoblotting

## Sheet: F1C
	Genotype
Rotarod test	Sptbn4F/F	Avil-cre; Sptbn4F/F
Latency to fall (s)	238	299.67
	123.33	193.67
	156	173
	186	184.333
	232.67	121
	225.33	175
	169
N (Animal tested)	7	6
Mean	190	191.1
Std. Deviation	43.65	58.89
Std. Error of Mean	16.5	24.04
Unpaired t test
P value	0.9708
P value summary	ns
Significantly different? (P < 0.05)	No
One- or two-tailed P value?	Two-tailed
t, df	t=0.03743 df=11

## Sheet: F1D
	Genotype
Hot plate test	Sptbn4F/F	Avil-cre; Sptbn4F/F
latency to response (s)	8.6	10.2
	10.1	9.7
	5.6	7.8
	15	12.5
	7.1	14
	11.1
N (Animal tested)	6	5
Mean	9.583	10.84
Std. Deviation	3.314	2.434
Std. Error of Mean	1.353	1.088
Unpaired t test
P value	0.5003
P value summary	ns
Significantly different? (P < 0.05)	No
One- or two-tailed P value?	Two-tailed
t, df	t=0.7023 df=9

## Sheet: F1F
	Genotype
CAP	Sptbn4F/F	Avil-cre; Sptbn4F/F
Velocity (m/s)	3	3.5
	6.02	3.71
	4.59	6.58
	4.51	6.34
	4.96	4.26
	5.07	3.95
	4.81	5.51
	6.67	4.67
	3.62	4.52
	3.62	4.11
	4.41	5.86
	7.14
N (Animal)	3	3
Total nerves recorded	12	11
Mean	4.868	4.819
Std. Deviation	1.236	1.078
Std. Error of Mean	0.3568	0.3251
Unpaired t test
P value	0.9202
P value summary	ns
Significantly different? (P < 0.05)	No
One- or two-tailed P value?	Two-tailed
t, df	t=0.1014 df=21

## Sheet: F1H
	Tissue_Genotype					Tissue_Genotype
	DR_Sptbn4F/F	DR_Avil-cre; Sptbn4F/F	VR_Avil-cre; Sptbn4F/F			DR_Sptbn4F/F	DR_Avil-cre; Sptbn4F/F	VR_Avil-cre; Sptbn4F/F
% of nodes labeled b4-spectrin	99.57	0	85.44		% of nodes labeled PanNav	100	97.87	95.08
	100	0	96.84			100	97.39	92.68
	96.13	1.49	91.43			98.47	97.64	97.83
N (Animal)	3	3	3		N (Animal)	3	3	3
Total nodes counted	518	420	303		Total nodes counted	398	421	296
Mean	98.57	0.4967	91.24		Mean	99.49	97.63	95.2
Std. Deviation	2.121	0.8603	5.702		Std. Deviation	0.8833	0.2401	2.577
Std. Error of Mean	1.225	0.4967	3.292		Std. Error of Mean	0.51	0.1386	1.488
	Avil-cre;Sptbn4 F/F dorsal root	Avil-cre;Sptbn4 F/F ventral root				Avil-cre;Sptbn4 F/F dorsal root	Avil-cre;Sptbn4 F/F ventral root
	vs.	vs.				vs.	vs.
	Sptbn4 F/F dorsal root	Avil-cre;Sptbn4 F/F dorsal root				Sptbn4 F/F dorsal root	Avil-cre;Sptbn4 F/F dorsal root
Unpaired t test					Unpaired t test
P value	1.97595e-07	1.07844e-05			P value	0.0246	0.1783
P value summary	***	***			P value summary	*	ns
Significantly different? (P < 0.05)	Yes	Yes			Significantly different? (P < 0.05)	Yes	No
One- or two-tailed P value?	Two-tailed	Two-tailed			One- or two-tailed P value?	Two-tailed	Two-tailed
t, df	t=74.21 df=4	t=27.25 df=4			t, df	t=3.513 df=4	t=1.631 df=4
P value
