# Supplementary material for: Nodal β spectrins are required to maintain Na+ channel clustering and axon integrity
Source: eLife. 2020 Feb 13;9:e52378. doi: 10.7554/eLife.52378 (PMC7018506; doi:10.7554/eLife.52378)
Supplement: Figure 2—source data 1. [file elife-52378-fig2-data1.xlsx]

## Sheet: F2C
	Genotype				Genotype				Genotype				Genotype
	Sptbn4F/F	Avil-cre; Sptbn4F/F			Sptbn4F/F	Avil-cre; Sptbn4F/F			Sptbn4F/F	Avil-cre; Sptbn4F/F			Sptbn4F/F	Avil-cre; Sptbn4F/F
% of nodes labeled b1-spectrin	0.43	100		% of nodes labeled b4-spectrin	99.57	0		% of nodes labeled AnkG	99	50		% of nodes labeled AnkR	11	88.33
	0	85			100	0			100	25.42			7.84	72.88
	3.87	98.51			96.13	1.49			93.33	28.68			10.83	75
N (Animal)	3	3		N (Animal)	3	3		N (Animal)	3	3		N (Animal)	3	3
Total nodes counted	518	420		Total nodes counted	518	420		Total nodes counted	322	374		Total nodes counted	322	374
Mean	1.433	94.5		Mean	98.57	0.4967		Mean	97.44	34.7		Mean	9.89	78.74
Std. Deviation	2.121	8.264		Std. Deviation	2.121	0.8603		Std. Deviation	3.597	13.35		Std. Deviation	1.777	8.375
Std. Error of Mean	1.225	4.771		Std. Error of Mean	1.225	0.4967		Std. Error of Mean	2.077	7.708		Std. Error of Mean	1.026	4.836
Unpaired t test				Unpaired t test				Unpaired t test				Unpaired t test
P value	4.62544e-05			P value	1.97595e-07			P value	0.0014			P value	0.0002
P value summary	***			P value summary	***			P value summary	**			P value summary	***
Significantly different? (P < 0.05)	Yes			Significantly different? (P < 0.05)	Yes			Significantly different? (P < 0.05)	Yes			Significantly different? (P < 0.05)	Yes
One- or two-tailed P value?	Two-tailed			One- or two-tailed P value?	Two-tailed			One- or two-tailed P value?	Two-tailed			One- or two-tailed P value?	Two-tailed
t, df	t=18.89 df=4			t, df	t=74.21 df=4			t, df	t=7.860 df=4			t, df	t=13.93 df=4
