# Supplementary material for: Nodal β spectrins are required to maintain Na+ channel clustering and axon integrity
Source: eLife. 2020 Feb 13;9:e52378. doi: 10.7554/eLife.52378 (PMC7018506; doi:10.7554/eLife.52378)
Supplement: Figure 3—source data 1. [file elife-52378-fig3-data1.xlsx]

## Sheet: F3C
	Genotype
Rotarod test	SptbF/F	Avil-cre; SptbF/F
Latency to fall (s)	225	241
	194.67	189
	260.33	281.67
	188	276.67
	188	266.33
	155.67	164.33
	300	214.67
	209	253
		296.33
		228.33
		207.33
N (Animal tested)	8	11
Mean	215.1	238.1
Std. Deviation	45.99	41.53
Std. Error of Mean	16.26	12.52
Unpaired t test
P value	0.2706
P value summary	ns
Significantly different? (P < 0.05)	No
One- or two-tailed P value?	Two-tailed
t, df	t=1.139 df=17

## Sheet: F3D
	Genotype
Hot plate test	SptbF/F	Avil-cre; SptbF/F
latency to response (s)	9.9	18.5
	11.2	13.5
	9	8.5
	9.1	9.6
	14.8	13.9
	7.2	9.3
		9.6
		9.5
N (Animal tested)	6	8
Mean	10.2	11.55
Std. Deviation	2.604	3.46
Std. Error of Mean	1.063	1.223
Unpaired t test
P value	0.4403
P value summary	ns
Significantly different? (P < 0.05)	No
One- or two-tailed P value?	Two-tailed
t, df	t=0.7982 df=12

## Sheet: F3F
	Genotype
CAP	SptbF/F	Avil-cre; SptbF/F
Velocity (m/s)	3.09	5
	4.44	3.23
	4.9	3.68
	3.62	5.97
	5.3	4.69
	5.64	4.17
	4.31	5.79
	3.62	5.26
	5.76	5.73
	4.55	4.13
	5.28	4.28
	4.95	4.85
N (Animal)	3	3
Total nerves recorded	12	12
Mean	4.622	4.732
Std. Deviation	0.8474	0.8665
Std. Error of Mean	0.2446	0.2501
Unpaired t test
P value	0.7562
P value summary	ns
Significantly different? (P < 0.05)	No
One- or two-tailed P value?	Two-tailed
t, df	t=0.3144 df=22

## Sheet: F3H
	Genotype				Genotype
	SptbF/F	Avil-cre; SptbF/F			SptbF/F	Avil-cre; SptbF/F
% of nodes labeled b4-spectrin	100	99.3		% of nodes labeled Nav	98.13	96.5
	100	99.07			99.2	97.2
	99.29	99.26			99.29	100
N (Animal)	3	3		N (Animal)	3	3
Total nodes counted	372	386		Total nodes counted	372	386
Mean	99.76	99.21		Mean	98.87	97.9
Std. Deviation	0.4099	0.1229		Std. Deviation	0.6453	1.852
Std. Error of Mean	0.2367	0.07095		Std. Error of Mean	0.3726	1.069
Unpaired t test				Unpaired t test
P value	0.0887			P value	0.4385
P value summary	ns			P value summary	ns
Significantly different? (P < 0.05)	No			Significantly different? (P < 0.05)	No
One- or two-tailed P value?	Two-tailed			One- or two-tailed P value?	Two-tailed
t, df	t=2.240 df=4			t, df	t=0.8596 df=4
