# Supplementary material for: Nodal β spectrins are required to maintain Na+ channel clustering and axon integrity
Source: eLife. 2020 Feb 13;9:e52378. doi: 10.7554/eLife.52378 (PMC7018506; doi:10.7554/eLife.52378)
Supplement: Figure 4—source data 1. [file elife-52378-fig4-data1.xlsx]

## Sheet: F4C
	Genotype
Rotarod test	SptbF/FSptbn4F/F	Avil-cre; SptbF/FSptbn4F/F
Latency to fall (s)	299.33	5.67
	246	5.33
	263.67	37.33
	288.33	32.67
	258.67	20
	215.33	9
	140	3
	140.67	4.33
		4.33
		3.67
N (Animal tested)	8	10
Mean	231.5	12.53
Std. Deviation	61.76	12.87
Std. Error of Mean	21.83	4.071
Unpaired t test
P value	7.17995e-09
P value summary	***
Significantly different? (P < 0.05)	Yes
One- or two-tailed P value?	Two-tailed
t, df	t=11.00 df=16

## Sheet: F4D
	Genotype
Tail immersion test	SptbF/FSptbn4F/F	Avil-cre; SptbF/FSptbn4F/F
latency to response (s)	2	6
	3	3
	6	6
	2	3
	4	3
	5	4
	5	6
	5	5
		7
		7
N (Animal tested)	8	10
Mean	4	5
Std. Deviation	1.512	1.633
Std. Error of Mean	0.5345	0.5164
Unpaired t test
P value	0.2011
P value summary	ns
Significantly different? (P < 0.05)	No
One- or two-tailed P value?	Two-tailed
t, df	t=1.333 df=16

## Sheet: F4F
	Genotype
CAP	SptbF/FSptbn4F/F	Avil-cre; SptbF/FSptbn4F/F
Velocity (m/s)	5.24	0.71
	4.6	2.09
	4.24	1.56
	4.9	1.1
	4.13	0.84
	4.39	0.95
	5.21	0.85
	4.35	0.86
	3.44	1.15
	4.63	0.88
	4.75	0.98
	4.29
N (Animal)	3	3
Total nerves recorded	12	11
Mean	4.514	1.088
Std. Deviation	0.4959	0.4022
Std. Error of Mean	0.1432	0.1213
Unpaired t test
P value	2.76334e-14
P value summary	***
Significantly different? (P < 0.05)	Yes
One- or two-tailed P value?	Two-tailed
t, df	t=18.09 df=21
