# Supplementary material for: Nodal β spectrins are required to maintain Na+ channel clustering and axon integrity
Source: eLife. 2020 Feb 13;9:e52378. doi: 10.7554/eLife.52378 (PMC7018506; doi:10.7554/eLife.52378)
Supplement: Figure 5—figure supplement 1—source data 1. [file elife-52378-fig5-figsupp1-data1.xlsx]

## Sheet: F5S1A
Age	1M		6M
Genotype	SptbF/FSptbn4F/F	Avil-cre; SptbF/FSptbn4F/F	SptbF/FSptbn4F/F	Avil-cre; SptbF/FSptbn4F/F
Nodes/FOV	56.0806	73.1348	27.7943	37.8929
	93.2139	112.949	55.887	44.2422
	110.877	65.0305	31.2419	24.3795
				58.8908
N (Animal)	3	3	3	4
Total FOV	8	7	9	12
Mean	86.7	83.7	38.3	41.4
Std. Error of Mean	16.1	14.8	8.85	7.16
P value	0.897		0.7976
P value summary	ns		ns
Significantly different? (P < 0.05)	No		No
One- or two-tailed P value?	Two-tailed		Two-tailed
t, df	t=0.1378 df=4		t=0.2705 df=5
