# Supplementary material for: Nodal β spectrins are required to maintain Na+ channel clustering and axon integrity
Source: eLife. 2020 Feb 13;9:e52378. doi: 10.7554/eLife.52378 (PMC7018506; doi:10.7554/eLife.52378)
Supplement: Figure 5—source data 1. [file elife-52378-fig5-data1.xlsx]

## Sheet: F5B
	Age_Genotype
	P8		1M		6M
	SptbF/FSptbn4F/F	Avil-cre; SptbF/FSptbn4F/F	SptbF/FSptbn4F/F	Avil-cre; SptbF/FSptbn4F/F	SptbF/FSptbn4F/F	Avil-cre; SptbF/FSptbn4F/F
% of nodes labeled PanNav	95	97.37	96.34	70.77	91.26	40.74
	91.21	80.36	97.08	84.13	93.42	32.17
	93.2	85.32	92.42	62.16	88.79	46.02
						39.84
N (Animal)	3	3	3	3	3	4
Total nodes counted	297	312	433	367	295	486
Mean	93.14	87.68	95.28	72.35	91.16	39.69
Std. Deviation	1.896	8.748	2.504	11.07	2.317	5.708
Std. Error of Mean	1.095	5.051	1.446	6.391	1.338	2.854
P value	0.3508		P value	0.0249	P value	2.8444e-05
P value summary	ns		P value summary	*	P value summary	***
Significantly different? (P < 0.05)	No		Significantly different? (P < 0.05)	Yes	Significantly different? (P < 0.05)	Yes
One- or two-tailed P value?	Two-tailed		One- or two-tailed P value?	Two-tailed	One- or two-tailed P value?	Two-tailed
t, df	t=1.055 df=4		t, df	t=3.499 df=4	t, df	t=14.47 df=5

## Sheet: F5C
	Avil-cre; SptbF/FSptbn4F/F			Avil-cre; SptbF/FSptbn4F/F
	1 month-old	6 month-old		1 month-old	6 month-old
% of nodes labeled AnkG	3.4	22.5	% of nodes labeled AnkR	63.2	42.5
	59.8	25		75.7	28.8
	29.3	9.8		85.9	25.5
		11.4			63.4
N (Animal)	3	4	N (Animal)	3	4
Total nodes counted	286	385	Total nodes counted	286	385
Mean	30.83	17.18	Mean	74.93	40.05
Std. Deviation	28.23	7.688	Std. Deviation	11.37	17.22
Std. Error of Mean	16.3	3.844	Std. Error of Mean	6.564	8.61
Unpaired t test			Unpaired t test
P value	0.3857		P value	0.0296
P value summary	ns		P value summary	*
Significantly different? (P < 0.05)	No		Significantly different? (P < 0.05)	Yes
One- or two-tailed P value?	Two-tailed		One- or two-tailed P value?	Two-tailed
t, df	t=0.9501 df=5		t, df	t=3.014 df=5
