# Supplementary material for: Nodal β spectrins are required to maintain Na+ channel clustering and axon integrity
Source: eLife. 2020 Feb 13;9:e52378. doi: 10.7554/eLife.52378 (PMC7018506; doi:10.7554/eLife.52378)
Supplement: Figure 6—source data 1. [file elife-52378-fig6-data1.xlsx]

## Sheet: F6B
	Age_Genotype
	1M				6M				9M+
	SptbF/FSptbn4F/F	Avil-cre; SptbF/F	Avil-cre; Sptbn4F/F	Avil-cre; SptbF/FSptbn4F/F	SptbF/FSptbn4F/F	Avil-cre; SptbF/F	Avil-cre; Sptbn4F/F	Avil-cre; SptbF/FSptbn4F/F	SptbF/FSptbn4F/F	Avil-cre; SptbF/F	Avil-cre; Sptbn4F/F	Avil-cre; SptbF/FSptbn4F/F
% of Tuj1+ labeled ATF3	0.27	0	1.62	0	0	0	1.16	18.63	1.53	1.67	0.28	7.49
	0	1.87	0.52	0.62	0	0	0	11.08	0.54	1.16	1.52	12.43
	0		0.26	0	0.83	0.26		12.27	0.26	0.66	1.73	15.08
N (Animal)	3	2	3	3	3	3	2	3	3	3	3	3
Total Tuj1+ neuron counted	1079	706	1082	950	1014	1007	653	1350	1119	950	1035	1266
Mean	0.09	0.935	0.8	0.2067	0.2767	0.08667	0.58	13.99	0.7767	1.163	1.177	11.67
Std. Deviation	0.1559	1.322	0.7219	0.358	0.4792	0.1501	0.8202	4.059	0.6673	0.505	0.7836	3.852
Std. Error of Mean	0.09	0.935	0.4168	0.2067	0.2767	0.08667	0.58	2.344	0.3852	0.2916	0.4524	2.224
	Avil-cre; SptbF/F Sptbn4F/F		Avil-cre; SptbF/F Sptbn4F/F		Avil-cre; SptbF/F Sptbn4F/F	Avil-cre; SptbF/F Sptbn4F/F			Avil-cre; SptbF/F Sptbn4F/F	Avil-cre; SptbF/F Sptbn4F/F	Avil-cre; SptbF/F Sptbn4F/F
	vs.		vs.		vs.	vs.			vs.	vs.	vs.
	SptbF/F Sptbn4F/F		Avil-cre; Sptbn4F/F		SptbF/F Sptbn4F/F	Avil-cre; SptbF/F			SptbF/F Sptbn4F/F	Avil-cre; SptbF/F	Avil-cre; Sptbn4F/F
Unpaired t test	Unpaired t test		Unpaired t test		Unpaired t test	Unpaired t test			Unpaired t test	Unpaired t test	Unpaired t test
P value	0.6321		0.2712		0.0044	0.0041			0.0085	0.0094	0.0099
P value summary	ns		ns		**	**			**	**	**
Significantly different? (P < 0.05)	No		No		Yes	Yes			Yes	Yes	Yes
One- or two-tailed P value?	Two-tailed		Two-tailed		Two-tailed	Two-tailed			Two-tailed	Two-tailed	Two-tailed
t, df	t=0.5176 df=4		t=1.275 df=4		t=5.812 df=4	t=5.930 df=4			t=4.825 df=4	t=4.683 df=4	t=4.622 df=4

## Sheet: F6C
	Avil-cre; SptbF/FSptbn4F/F
Age	6M		9M
DRG neuron diameter	Total DRG diameter	ATF3+ DRG diameter	Total DRG diameter	ATF3+ DRG diameter
N (Animal)	3	3	3	3
DRG neuron counted	1078	97	1005	82
Minimum	8.09	9.49	9.11	15
25% Percentile	15	20.5	16.6	22.8
Median	19.1	23.1	21	26
75% Percentile	24.2	25.7	26.4	29.7
Maximum	36	35.1	39.8	39.2
Mean	19.8	23.2	21.6	26
Std. Error of Mean	0.177	0.455	0.199	0.559
Unpaired t test			Unpaired t test
P value	6.60595e-07		P value	8.06062e-10
P value summary	***		P value summary	***
Significantly different? (P < 0.05)	Yes		Significantly different? (P < 0.05)	Yes
One- or two-tailed P value?	Two-tailed		One- or two-tailed P value?	Two-tailed
t, df	t=5.618 df=1173		t, df	t=6.199 df=1085
	6M		9M
	Total DRG diameter	ATF3+ DRG diameter	Total DRG diameter	ATF3+ DRG diameter
	22.3988	22.3988	19.981	31.3951
	20.4964	24.7491	23.5013	30.9901
	18.6953	24.9471	19.1738	29.8449
	28.8949	26.6021	19.5889	27.9453
	20.7926	23.239	13.9155	26.9105
	16.6604	23.374	11.2927	25.8903
	27.311	21.3042	11.6961	23.7855
	15.8523	25.6776	16.4749	20.8779
	17.3943	18.3833	18.2574	20.4019
	25.1178	21.7315	12.1715	19.5889
	21.6669	19.0792	23.7855	15.4571
	20.4281	23.539	14.7932	33.2827
	14.0892	24.2189	15.8916	32.0098
	13.9267	23.7764	29.261	30.437
	20.1771	29.9285	26.5505	30.2216
	24.8196	28.4345	22.2546	29.3215
	19.0259	19.6534	14.1653	28.8194
	12.6725	23.6245	14.0468	27.2746
	24.7491	17.9394	25.4167	26.6505
	13.4775	20.464	30.5841	26.5879
	21.2628	25.6368	16.4847	25.7842
	27.2351	35.1063	26.389	23.2518
	19.2403	22.4467	26.9125	17.9635
	24.7773	28.1876	23.7742	14.982
	12.1224	22.7622	15.6032	29.6986
	22.2758	20.7402	20.4019	28.0682
	24.9471	21.7223	11.8216	27.0658
	24.334	20.1054	16.7034	26.1835
	22.6498	28.0691	14.7408	25.298
	26.386	23.7549	25.6231	25.002
	25.0417	23.3774	23.6824	20.8681
	33.451	27.8026	11.8413	27.5384
	21.6542	26.5363	11.6031	22.086
	20.7843	32.9678	14.0422	21.547
	26.6021	33.7972	13.5717	21.2436
	33.716	21.7358	27.0221	17.7735
	16.0788	19.2982	18.3085	19.4941
	31.8515	22.7381	17.6745	15.2539
	19.3478	19.4955	29.0174	22.9525
	18.4727	22.9899	21.333	21.3197
	19.9352	27.0638	31.3951	15.324
	15.6204	25.6902	15.499	24.9837
	24.42	24.7459	13.601	23.2864
	17.9415	21.4308	13.5606	26.8585
	23.239	24.9708	18.2344	29.4879
	17.3503	27.048	19.3204	24.0652
	23.374	17.9687	17.7672	33.5313
	18.8353	19.0571	17.99	32.2907
	21.3042	25.0953	16.3569	24.2831
	18.3212	30.5868	37.447	25.0277
	19.1728	24.5867	15.4571	22.4526
	22.0267	18.0626	31.3643	38.8692
	25.6776	20.4553	28.4004	23.8239
	23.2679	22.0173	13.7335	39.1558
	18.3833	19.5148	27.9328	30.361
	21.7315	26.4043	13.316	21.925
	29.9994	27.7746	21.1804	23.4784
	21.067	18.5045	14.6186	31.9627
	21.1124	33.9234	18.109	26.3523
	17.8652	31.6373	18.9863	25.6651
	14.2013	25.1413	24.9417	30.6622
	13.3664	29.8034	30.3751	24.3473
	22.6402	9.48635	15.9283	29.0498
	23.4532	26.4175	16.7579	27.3031
	15.4793	22.2391	13.199	29.6452
	17.9774	22.9601	21.4498	28.0538
	20.3636	23.0723	14.4752	24.2843
	14.4821	23.1604	14.2759	34.0539
	20.0773	21.6336	15.1288	33.569
	22.733	15.2708	28.4042	21.4198
	22.0117	11.344	25.4463	24.8304
	24.9374	20.1867	17.2437	30.1923
	16.2434	23.2945	34.1437	32.3855
	16.0948	25.8373	11.7794	28.4326
	31.0066	22.9211	18.4075	21.5472
	28.5477	20.9136	25.2469	20.1156
	18.1536	23.8475	30.4043	25.6032
	24.2355	21.5524	12.9931	34.4814
	20.3536	14.732	26.6172	23.2783
	31.3411	22.3332	12.5426	26.8174
	26.6949	24.8142	26.3961	23.2783
	19.0792	14.2444	30.9901	26.058
	32.0207	23.6506	14.7095
	26.1321	19.5078	20.8779
	12.5715	23.6802	21.9351
	25.4093	21.7857	21.7282
	18.7027	15.6551	24.7871
	22.0498	26.7994	16.0064
	17.4214	24.3848	13.9774
	14.1934	18.5212	16.0091
	15.6453	26.6535	20.2591
	20.3393	21.2807	29.8449
	22.586	28.3161	23.2089
	11.5124	22.4418	11.8277
	17.4981	20.2169	18.9818
	27.2114	22.7307	11.9907
	13.0949	19.0726	17.0731
	16.0768		14.849
	27.9001		16.1818
	22.8591		24.111
	20.4619		14.522
	30.7629		27.9453
	20.044		21.8843
	20.6502		22.3281
	18.2438		18.2834
	11.3003		21.9116
	24.9061		14.3669
	30.0969		14.8133
	22.524		26.9105
	18.8049		15.3133
	13.8607		25.8903
	13.2409		25.0299
	15.0675		22.3627
	26.9424		15.3814
	15.8879		21.4608
	18.659		21.6438
	32.0056		15.4087
	11.2285		19.6717
	23.539		14.1163
	30.5428		12.0414
	17.452		14.2541
	14.6223		29.924
	23.6427		21.1972
	15.6737		14.0191
	24.2189		15.0686
	24.6086		21.5839
	18.1468		11.703
	12.0466		14.5282
	13.4972		17.2005
	28.2733		17.4775
	24.8531		26.3931
	19.2604		16.7633
	21.4182		19.001
	30.9276		21.6076
	9.36602		16.5721
	12.5745		25.5233
	28.8949		17.8752
	32.5205		21.0275
	20.174		28.8194
	31.6348		33.2827
	15.9477		21.6138
	30.7699		15.0313
	10.8536		17.8298
	20.1337		15.1057
	23.4245		24.0227
	15.2364		24.7393
	30.8292		15.9933
	22.7889		17.9714
	24.2455		21.5198
	14.3154		19.7474
	11.8125		15.656
	23.7764		22.1128
	17.9394		29.0267
	14.0595		28.4855
	17.2744		31.3025
	26.6263		20.4842
	10.5461		21.5737
	14.7934		20.7083
	25.7717		9.94126
	11.5336		38.618
	15.1714		21.1001
	15.2968		17.7238
	18.1122		21.0701
	23.1483		27.4749
	22.9107		15.0725
	24.3031		35.8068
	19.1089		17.9635
	20.6467		30.2216
	10.8178		20.1943
	24.7567		20.4842
	20.7494		14.1313
	25.6619		14.947
	24.4167		17.332
	16.1848		17.6888
	10.9384		12.6266
	16.931		17.5708
	31.1501		22.1252
	13.054		27.0698
	29.2967		24.0741
	19.7202		19.4052
	21.8449		12.1215
	13.8892		19.4277
	17.3947		38.2467
	23.8746		17.0339
	16.2958		18.0016
	18.8949		30.9814
	19.4421		31.03
	12.3249		18.2728
	24.0853		18.9355
	27.5579		15.6781
	17.9625		22.2102
	11.6493		18.9629
	26.5697		34.3337
	14.1471		20.0602
	25.7383		16.4249
	18.72		19.4155
	18.0998		15.4701
	28.9729		25.7842
	23.6245		19.4816
	30.7393		21.3919
	24.1689		17.1667
	24.9029		19.2902
	29.9285		15.0597
	28.4345		21.4852
	15.1643		23.8543
	14.3819		21.9765
	11.3362		29.9168
	24.2477		19.9991
	29.7384		27.2746
	23.0589		15.9231
	19.6534		16.8384
	26.3788		17.3514
	26.2829		31.2458
	10.1949		34.5203
	16.9024		20.3071
	16.3055		14.3019
	24.5704		19.1175
	20.89		19.7877
	24.8467		14.982
	26.5393		25.6326
	14.4732		29.0035
	14.4667		17.4106
	35.9671		29.3408
	33.9551		18.5385
	19.5367		14.6629
	15.7199		17.9822
	25.4051		16.1838
	14.1376		23.2518
	24.1889		16.2391
	14.1469		21.6265
	28.0615		23.0307
	31.2286		18.4625
	19.282		27.2174
	24.9266		14.4593
	20.4062		32.4609
	20.464		15.2299
	21.5569		29.3215
	22.679		13.681
	21.4083		28.0931
	17.2682		27.5091
	13.0997		10.0135
	29.2913		18.4371
	10.1046		32.0098
	28.0385		21.8389
	15.5454		14.2827
	25.6368		25.7571
	13.5316		19.2671
	24.1589		17.0422
	27.5423		30.437
	25.2224		15.3598
	13.819		12.9826
	31.5011		28.2524
	13.6166		12.032
	12.7114		17.7755
	21.8205		29.9312
	12.467		16.9638
	30.4855		26.6505
	35.1063		16.9907
	28.3824		13.0748
	11.4438		22.662
	21.7578		26.5879
	18.8179		16.5258
	15.2225		14.3304
	28.8111		13.7552
	18.6555		14.4542
	33.0053		21.49
	27.3317		27.9194
	22.4467		14.9162
	28.095		28.7438
	27.4161		17.4463
	26.9833		20.8157
	26.06		13.6727
	15.5239		16.813
	18.195		26.7773
	11.7835		21.6692
	28.1876		24.3859
	15.554		30.0495
	15.541		20.8681
	20.3708		26.1835
	15.4097		27.1462
	13.0586		17.0059
	24.1678		26.2358
	17.128		14.021
	18.7468		17.5663
	15.9484		25.298
	32.8478		28.0624
	16.6778		28.0682
	19.5732		26.0218
	25.1242		18.9873
	18.7105		27.0658
	33.7685		21.5231
	15.0463		14.8756
	22.7622		13.7527
	20.7402		27.3228
	23.8622		16.0993
	23.5173		24.4684
	21.7223		25.6441
	16.2861		26.7321
	28.5778		13.4531
	33.5449		24.1811
	31.0412		21.2736
	29.4569		24.3561
	29.7863		18.7243
	26.9364		23.8182
	24.9697		22.0317
	16.2821		13.0456
	22.3887		19.8863
	28.5288		22.4275
	20.1054		17.2749
	27.1095		32.0459
	27.2055		20.9212
	19.7527		30.4388
	14.3445		25.002
	25.168		18.0458
	33.8019		20.6016
	28.0691		15.6851
	22.7148		25.8997
	17.9237		29.6986
	11.8499		29.5889
	13.0476		38.1242
	14.6487		22.3535
	23.7549		22.182
	29.8205		21.0421
	16.2289		12.471
	27.4837		22.4972
	13.5865		18.7082
	13.3935		12.1934
	15.1481		27.5384
	23.3774		18.5459
	27.8026		29.517
	26.5363		17.5883
	14.0083		17.1512
	10.995		27.8982
	16.783		22.086
	29.0609		27.8403
	32.9678		10.6106
	17.2878		21.547
	14.9596		17.2858
	24.1655		14.4045
	16.1788		21.076
	33.7972		19.5451
	24.7241		22.7725
	16.2378		14.2917
	17.6367		23.4452
	19.0457		28.6923
	21.7358		18.9483
	25.3733		14.9851
	20.9125		21.1109
	19.2982		16.6739
	33.0761		32.2807
	20.0474		27.039
	34.1516		21.2436
	26.4104		27.3887
	22.7381		25.6273
	22.6836		12.5177
	30.6684		14.6074
	25.441		13.6525
	18.3341		20.1748
	18.0346		24.8023
	14.4849		29.371
	17.7691		17.7735
	16.3283		26.3278
	14.3379		34.8505
	33.5281		19.4941
	23.3889		15.4576
	26.513		17.1352
	12.0597		14.357
	31.6407		25.421
	24.686		24.4849
	23.8723		26.7994
	13.9556		15.2539
	19.4955		23.3141
	20.5579		23.6347
	24.0406		25.882
	21.1127		12.0256
	21.9997		22.7677
	17.0405		23.1855
	16.8195		18.1777
	29.8178		16.9043
	22.9899		15.6039
	15.9802		22.9525
	29.5261		22.7883
	22.3452		21.3197
	33.3359		28.3749
	12.7499		18.6642
	30.1513		23.7843
	27.0778		19.9753
	25.4305		20.7885
	16.2009		15.324
	13.5632		22.6903
	10.7313		15.044
	27.0638		23.9387
	29.3316		13.0198
	25.6902		19.4336
	22.5658		28.9469
	22.3419		25.2054
	23.1275		23.7436
	23.3705		25.6787
	19.0241		15.3231
	25.8342		23.2864
	17.8786		36.2336
	24.7459		30.7279
	18.9282		17.7646
	15.3881		21.0487
	19.9031		14.9854
	21.4308		11.5397
	13.369		29.0618
	13.4449		20.3234
	31.1838		15.7158
	13.6253		27.6767
	27.1105		21.0953
	24.9708		11.7844
	19.5016		28.3616
	19.749		16.7529
	20.2713		30.2483
	14.4544		16.9737
	24.4849		13.6462
	27.048		26.8585
	18.1109		18.8922
	32.2366		15.3456
	21.358		23.5527
	17.9687		26.0621
	12.1446		18.1303
	24.1132		14.2507
	33.2714		25.9898
	15.5364		29.4879
	14.1729		14.8967
	20.0627		16.0114
	13.121		14.106
	24.3892		17.0006
	14.3892		24.063
	17.243		10.3874
	26.058		39.7742
	25.9815		30.3184
	20.4105		15.438
	19.0571		22.225
	25.0953		30.3238
	17.1856		27.5706
	15.2287		37.7921
	30.5868		16.1753
	24.5867		17.3064
	23.0624		25.5149
	14.7959		13.4857
	20.8076		26.4856
	19.6973		28.5138
	13.8201		25.3182
	22.0168		24.111
	28.5966		37.9397
	18.0626		19.0085
	10.2909		29.4706
	12.5933		14.1837
	20.4553		27.6961
	28.9868		16.5646
	15.8113		20.6339
	18.163		14.9277
	27.4191		22.0036
	16.7405		24.0652
	23.9847		21.409
	20.908		27.3297
	19.912		15.7303
	15.9847		17.2046
	16.6749		13.5794
	21.1372		17.5867
	28.4165		13.7014
	30.8397		16.4733
	24.8055		23.7017
	16.1964		15.4621
	17.4641		14.9779
	22.8888		24.613
	27.2025		24.8802
	25.9349		12.9964
	16.3858		17.5236
	28.4335		14.7408
	25.1413		14.8787
	15.0461		24.9061
	25.076		15.1754
	25.7665		19.9272
	22.0173		33.5313
	22.2734		23.1091
	13.8139		37.1088
	22.5999		32.3539
	17.9641		16.8851
	17.7675		38.9845
	21.557		24.1711
	15.238		31.1173
	13.7773		32.2907
	14.7298		15.365
	19.9628		30.1335
	19.0512		11.7566
	18.9425		25.7925
	27.0062		23.5173
	29.5261		18.0803
	14.3553		24.2831
	18.7752		19.0028
	19.5148		19.3222
	27.6096		13.5972
	32.7863		16.8527
	18.3219		14.081
	24.387		39.4178
	14.2912		25.441
	27.3877		25.0277
	23.006		19.2478
	25.2267		11.1701
	11.271		11.9437
	12.8697		22.3047
	10.7892		16.4838
	19.1872		37.5158
	13.3247		10.3389
	25.3786		29.5016
	15.943		22.4526
	27.9136		32.3323
	8.32301		19.6197
	13.4007		26.8865
	14.1902		16.1713
	13.5082		19.1318
	13.249		10.4073
	23.96		18.0858
	11.9615		22.8701
	26.4043		38.8692
	16.0465		29.1671
	16.5742		29.1717
	25.9794		29.8899
	16.3326		23.629
	21.1649		17.6052
	13.8596		13.7462
	14.9757		22.9807
	16.0032		14.787
	9.48663		21.2478
	28.6361		31.113
	19.3268		23.3981
	27.7746		21.1522
	13.2112		27.5032
	24.6904		20.9919
	12.9484		22.5204
	11.8375		23.8239
	16.5571		21.5605
	14.1981		21.1736
	17.0059		26.7049
	15.2486		16.7076
	24.4728		11.2239
	25.8508		29.5662
	18.3241		20.1058
	15.8121		9.22228
	10.2593		14.7812
	13.5219		16.0574
	12.3539		18.7194
	20.1082		39.1558
	14.5057		28.8735
	18.5045		15.1983
	13.3599		19.3818
	11.1028		25.0921
	26.093		25.1574
	13.1468		23.8633
	19.9157		25.0589
	14.8048		16.4452
	14.9005		30.361
	16.7034		28.4156
	19.1151		15.5111
	12.2185		18.7888
	11.0892		16.8768
	14.3362		16.2055
	15.3195		21.925
	33.9234		16.9448
	30.2323		34.1217
	18.7165		19.6181
	22.9714		21.0581
	22.0556		12.3902
	22.4717		23.9342
	17.8589		30.1219
	16.8817		11.233
	28.2153		21.5675
	11.6311		23.4784
	14.1045		13.1853
	16.3546		18.506
	25.9442		25.8342
	17.0642		12.7292
	26.2859		25.2927
	11.9288		25.046
	30.8501		17.1678
	17.3022		21.8936
	12.8914		17.968
	12.7545		11.3516
	20.1417		31.8752
	16.0415		15.0386
	19.2467		16.424
	12.0931		14.5988
	14.0925		26.595
	10.5103		33.8178
	26.7351		24.0686
	13.4095		16.6126
	8.615		31.9627
	25.0105		10.4829
	14.6478		18.7154
	10.1941		17.0127
	14.8814		23.4394
	15.2651		29.5161
	15.185		18.2434
	19.4849		20.3238
	15.8622		20.9383
	13.9837		20.752
	18.1103		33.2851
	16.406		14.6515
	31.8768		14.205
	10.5794		21.6814
	13.2998		27.2144
	12.882		13.1312
	12.0007		14.883
	8.98789		24.59
	26.7763		32.8821
	16.3307		13.3702
	19.2087		16.4377
	23.6813		32.3381
	11.1499		13.1882
	13.1163		28.4505
	26.8094		22.669
	11.847		25.7665
	9.35539		21.69
	14.107		18.9843
	16.2942		25.6441
	16.6701		19.0513
	11.8429		26.3523
	26.4653		16.8184
	18.8195		28.4165
	27.7717		24.8412
	12.4939		16.5592
	15.3256		25.5159
	14.7349		17.1892
	12.4674		15.9716
	31.6373		17.7849
	16.0031		17.0566
	25.1413		23.1598
	19.8187		17.4373
	14.1881		28.1571
	14.2678		16.8202
	14.1868		15.9259
	15.6568		25.183
	17.5446		13.2185
	17.3607		23.6506
	16.2335		28.0414
	31.1329		31.3179
	13.9774		31.3677
	19.7546		13.9816
	23.6711		20.0825
	23.7119		17.5023
	21.3846		17.4108
	18.6858		9.10761
	29.8034		28.2942
	15.22		19.7945
	12.2821		27.9068
	18.4349		17.4601
	26.5059		19.0157
	11.7981		25.6651
	31.1165		18.8086
	15.8213		17.6774
	12.6463		14.5421
	22.3359		21.4334
	25.0514		21.1965
	16.3915		18.8211
	28.1342		26.5879
	24.2055		14.0793
	16.9013		25.1413
	14.9879		19.2524
	16.4735		30.6622
	17.3201		32.8756
	16.9713		17.8822
	26.3788		17.7901
	16.0774		32.5172
	15.8596		23.7278
	19.9264		31.0733
	17.6259		29.0193
	14.0029		29.0174
	13.7679		34.117
	16.3822		28.1208
	17.4327		15.7228
	24.7524		29.8961
	14.1056		17.5256
	19.0253		27.1729
	16.6681		24.3473
	20.3788		24.5922
	17.3705		16.3431
	11.2782		25.685
	16.7161		13.8737
	8.59814		26.7391
	12.8161		13.9968
	17.1971		20.1138
	16.9775		25.4347
	16.6518		18.2559
	27.8693		15.0189
	15.0347		17.6469
	18.2806		28.6755
	32.8993		27.3051
	13.4121		18.6745
	15.4667		12.2079
	21.4686		29.8827
	27.3071		19.7976
	13.6146		16.1394
	16.5867		18.9492
	32.5064		30.748
	18.1685		25.4927
	16.3641		27.2095
	12.5222		28.7532
	8.09412		16.6989
	12.6763		16.5973
	13.2591		16.1419
	19.6085		20.194
	14.5277		15.6755
	28.4071		15.3247
	13.212		16.3326
	18.908		27.0748
	18.567		25.3479
	14.3907		26.9723
	26.4175		27.3572
	28.9822		31.4703
	15.8094		17.3164
	15.7944		28.5524
	12.2235		18.782
	13.0871		19.8797
	13.7335		23.3475
	15.1534		24.0406
	12.9975		19.1249
	19.2392		17.0911
	19.4205		21.3174
	16.422		21.8945
	14.7921		16.0602
	20.7364		37.1812
	13.8491		25.9173
	9.40525		22.1951
	25.9732		14.7271
	21.3729		14.5412
	17.9583		26.2645
	26.0301		23.2702
	14.2442		19.0861
	15.0277		18.0142
	14.6614		29.0498
	15.3585		17.2434
	23.8543		20.3609
	14.2819		16.106
	22.771		28.5288
	13.2683		31.9097
	19.3791		19.6453
	16.7494		24.1711
	19.345		20.3256
	21.5552		12.0318
	13.2248		26.6979
	9.23189		10.142
	21.0461		14.1989
	22.0074		24.8315
	19.5699		17.4632
	11.9178		17.4349
	19.0581		27.3031
	27.1749		14.6953
	24.1366		16.1909
	14.8072		16.7641
	13.167		19.8868
	11.5808		23.8261
	23.9981		29.6452
	17.1534		31.3531
	16.0555		28.1112
	15.5225		28.0538
	15.8916		15.6249
	14.1311		15.7245
	23.5356		19.3238
	15.8206		17.4423
	16.7958		22.537
	17.7619		23.5195
	15.2219		13.1896
	14.2176		13.8753
	15.5709		21.0793
	18.3496		20.1486
	14.3207		28.0231
	15.1188		35.5181
	28.3464		28.1705
	14.6663		24.2843
	19.9992		34.0539
	23.7221		27.5911
	22.5957		28.9776
	15.2708		18.0474
	11.1374		15.2493
	15.6551		18.051
	14.4514		23.5846
	13.2082		28.0845
	19.7054		24.8467
	20.0714		18.879
	25.4072		33.256
	12.6197		37.7828
	11.4073		16.2448
	22.4172		30.5331
	15.2512		23.1064
	17.1565		17.8885
	22.7685		25.6536
	13.3484		28.3436
	18.967		18.6404
	16.5516		16.6075
	11.8894		34.8412
	13.8143		27.6096
	15.3736		33.8639
	14.8906		24.4629
	17.1727		27.6047
	14.2461		33.9907
	15.2225		21.3834
	21.3101		29.8755
	10.519		28.8726
	15.3638		15.2096
	14.3538		15.3526
	22.636		20.114
	19.227		20.917
	13.9595		33.167
	25.183		27.1462
	13.8563		19.7635
	14.2486		15.3035
	15.1504		17.0602
	17.6065		18.2774
	13.4081		28.1895
	15.2696		19.8357
	15.824		24.1266
	15.0777		20.2599
	17.6143		16.7511
	21.1212		25.7404
	14.9678		21.6218
	22.9601		19.5316
	22.82		25.6253
	11.6715		20.4596
	23.0723		17.1925
	12.295		20.0513
	19.5438		17.9628
	15.3713		18.0416
	11.9124		23.7006
	19.7703		20.0362
	25.1712		17.6381
	16.4557		18.5782
	13.1095		22.3768
	21.0147		19.4976
	21.8274		30.2847
	15.1188		22.1211
	21.6336		27.0599
	12.5632		30.0459
	17.9704		33.569
	28.2534		25.1744
	15.281		21.1652
	18.1325		22.7612
	14.5967		21.309
	23.1604		24.8044
	19.624		32.7059
	16.0609		21.3312
	23.3613		17.3013
	13.8112		14.0392
	20.9663		35.8915
	15.8085		30.7699
	23.3786		18.8714
	13.9466		21.4198
	16.2236		29.1616
	18.126		19.2503
	15.9691		10.3615
	15.262		31.4285
	12.4227		21.7368
	21.333		24.4035
	14.5068		26.3238
	19.5669		23.6051
	13.1492		31.3351
	22.2391		31.4293
	11.7751		16.2231
	18.6619		17.4669
	12.398		21.4623
	22.9688		16.095
	22.2019		28.6323
	11.344		30.4149
	22.4785		17.3598
	25.0814		24.4574
	12.4231		37.7373
	26.721		16.6936
	20.1867		16.6131
	24.8153		18.7024
	23.0494		28.221
	27.2203		11.2016
	13.3619		20.9648
	17.488		28.8278
	23.2945		29.7239
	18.2681		24.1811
	13.1011		16.5368
	20.3292		35.6066
	21.3131		31.6033
	23.2032		21.3291
	13.7459		29.5952
	23.8171		22.7292
	11.0989		28.7335
	18.7234		28.026
	25.8373		19.0191
	15.1602		24.7285
	22.492		25.3818
	18.9191		28.8856
	22.9211		26.5879
	13.3752		12.4369
	22.2464		15.8043
	28.2581		29.4368
	12.0347		33.6665
	17.7455		28.2828
	20.5167		30.3512
	20.9136		16.3019
	20.2086		22.2547
	14.628		11.9538
	24.9987		22.6328
	14.8128		18.6105
	14.2475		22.5315
	22.6992		12.391
	17.9322		17.3513
	25.4632		24.8304
	15.5573		25.2459
	28.8744		26.4104
	25.136		31.5573
	23.4932		19.033
	17.0838		13.2305
	23.6404		19.1259
	20.3198		25.8269
	17.3957		22.8359
	18.6156		28.2048
	14.2752		10.9178
	13.1206		19.6415
	14.5005		17.447
	11.9913		14.1811
	23.8475		30.1923
	16.1042		9.9345
	21.6985		17.903
	24.905		13.7839
	15.4075		26.3911
	11.832		32.3855
	28.0366		28.4307
	21.5524		9.91418
	28.8902		11.2285
	14.732		21.0158
	28.0155		18.6571
	16.0928		21.5472
	15.2771		20.1156
	27.9655		18.0865
	22.3332		16.3126
	31.3677		27.7755
	18.6953		21.0756
	21.5604		12.0218
	24.532		17.9874
	24.8142		26.7411
	25.2331		24.5397
	14.2444		27.629
	30.6631		22.6985
	19.1803		15.6379
	15.1449		29.1496
	23.6381		20.8632
	28.2743		17.6707
	15.4188		10.4642
	23.6506		15.2725
	14.6254		22.1862
	16.616		26.3176
	23.8081		18.6722
	24.4651		20.9383
	19.5078		23.4578
	23.6802		25.6032
	28.0174		16.0515
	24.6751		23.0113
	18.7408		25.9277
	14.5647		27.8499
	12.3743		17.3553
	14.0463		12.8167
	18.5219		24.1422
	21.0702		17.3561
	14.0081		23.721
	25.6158		16.5459
	13.993		18.8549
	23.6881		16.0995
	24.8402		28.3967
	15.1513		13.8015
	21.7857		20.2879
	13.8536		14.9
	13.039		12.9689
	22.5358		20.5611
	15.792		29.2958
	12.7027		28.2819
	13.3374		30.851
	10.9593		25.1606
	13.3156		34.4814
	21.434		17.3528
	22.1992		16.449
	21.5905		10.3066
	16.8288		19.4147
	20.1634		17.6226
	22.2015		23.2783
	24.8942		25.4748
	29.0063		16.2436
	18.5728		26.1743
	30.7262		16.4137
	14.1011		29.2527
	13.5261		18.9631
	15.1307		33.4872
	15.907		13.563
	26.4063		25.6839
	16.2279		28.0596
	14.2237		16.144
	14.589		14.2761
	22.5673		19.4374
	9.45399		26.8174
	15.758		31.39
	15.6551		23.2783
	19.8648		15.7725
	15.2075		14.1695
	26.7994		26.058
	16.3786		26.8074
	26.7793		39.0575
	24.3848		28.5072
	23.1082
	15.3939
	20.8777
	18.3304
	26.5181
	20.6474
	21.9719
	10.7922
	30.2643
	22.2656
	14.9581
	17.5576
	17.2579
	27.5111
	22.8319
	15.9745
	11.1769
	12.7159
	30.0897
	20.3409
	23.3268
	20.6366
	21.3702
	16.8455
	21.2968
	18.5212
	27.7697
	25.1595
	19.6273
	12.3439
	26.6535
	19.4993
	25.5444
	13.068
	21.6771
	27.6679
	28.4156
	21.2807
	16.4428
	11.7424
	17.3018
	18.7614
	13.5334
	15.8143
	31.1924
	10.7065
	11.8327
	29.558
	28.3161
	22.4418
	15.4134
	26.1167
	11.9329
	19.1236
	16.6062
	20.2169
	22.2201
	19.0118
	22.7307
	29.0035
	19.1941
	24.5758
	24.0809
	16.1527
	11.6047
	13.5677
	20.4855
	25.1285
	9.20215
	11.0024
	19.0726
	22.4415
	17.7285

## Sheet: F6E
	Genotype
Axon circularity	SptbF/FSptbn4F/F	Avil-cre; SptbF/FSptbn4F/F
	0.757801	0.547575
	0.719078	0.629557
	0.723361	0.590278
N (Animal)	3	3
Total axons counted	533	873
Mean	0.7334	0.5891
Std. Deviation	0.02123	0.041
Std. Error of Mean	0.01226	0.02367
Unpaired t test
P value	0.0056
P value summary	**
Significantly different? (P < 0.05)	Yes
One- or two-tailed P value?	Two-tailed
t, df	t=5.412 df=4

## Sheet: F6F
SptbF/FSptbn4F/F		Avil-cre; SptbF/FSptbn4F/F
Axon diameter	g-ratio	Axon diameter	g-ratio
3.32775	0.721074	6.86819	0.668138
2.81782	0.682656	1.60016	0.553031
1.83837	0.599693	1.33831	0.462816
2.45754	0.589473	1.88524	0.445113
1.61482	0.628507	2.95896	0.54517
1.46161	0.570586	3.97332	0.394087
4.49543	0.71704	0.833991	0.293138
7.92922	0.75036	1.38601	0.377929
4.80101	0.667606	0.974189	0.383293
3.26709	0.643764	2.18769	0.383855
1.36471	0.406399	3.30951	0.457308
4.26719	0.59197	2.22608	0.375416
3.89169	0.665328	1.16422	0.38533
2.92039	0.648491	2.76696	0.594934
4.15894	0.687895	2.00572	0.422599
4.28045	0.626811	2.4194	0.496381
2.95163	0.653216	2.79923	0.460937
2.71772	0.646176	1.58094	0.408613
2.71373	0.673755	2.72871	0.540696
2.85711	0.604344	1.10701	0.341559
3.07569	0.628056	2.14417	0.435314
1.02516	0.519238	4.13298	0.6105
2.71185	0.607104	7.41637	0.597725
1.98466	0.685707	1.41916	0.3973
3.12214	0.640663	1.5761	0.412465
2.8649	0.594564	2.3205	0.494032
2.76212	0.60289	2.44246	0.495354
1.5426	0.58273	5.04414	0.580552
2.09062	0.60583	1.87236	0.469381
2.5893	0.550845	1.51174	0.395467
2.42098	0.555579	0.982652	0.444235
2.46556	0.649186	5.12108	0.620499
3.78969	0.753479	2.11636	0.478878
1.33689	0.583058	2.05125	0.539385
2.44663	0.617611	1.40382	0.42103
3.9421	0.684319	5.4538	0.602052
3.50614	0.638034	1.06777	0.360833
1.79419	0.649624	3.16731	0.530633
2.62375	0.655078	4.10701	0.497791
3.60219	0.716759	6.06367	0.650089
3.01863	0.575903	3.31682	0.518742
1.60294	0.609135	3.67293	0.589325
3.76677	0.640429	1.12867	0.362167
1.45725	0.616009	1.09545	0.428767
1.65225	0.568917	1.24971	0.443931
1.50794	0.570936	1.65225	0.393271
2.34697	0.570358	3.53869	0.536758
4.59396	0.702646	2.23036	0.392825
2.8336	0.616253	1.41826	0.442037
2.44246	0.516828	2.75172	0.559382
2.45624	0.629564	5.02034	0.600319
1.22656	0.548117	3.11745	0.504046
2.60988	0.648633	3.51031	0.566277
2.55637	0.663441	1.50836	0.404084
0.87717	0.450811	1.0479	0.327151
2.76327	0.675168	3.32526	0.479928
3.73586	0.666153	3.49303	0.576879
3.30219	0.73438	2.08146	0.36488
2.69158	0.602296	2.76995	0.518795
1.00508	0.482519	3.06926	0.511897
2.63586	0.618354	0.934137	0.311225
3.82283	0.62079	6.25804	0.606843
2.85331	0.633597	2.29899	0.418459
2.96584	0.591962	1.2177	0.408658
2.49126	0.614314	1.33498	0.358521
3.09695	0.658122	2.25281	0.502545
1.36843	0.561409	1.19393	0.390958
1.19979	0.561194	1.0479	0.353605
2.76373	0.600931	1.6453	0.46822
3.95983	0.593931	1.34638	0.451453
2.24403	0.619295	1.87202	0.423011
1.35393	0.589136	1.06478	0.402486
1.52056	0.593656	1.70051	0.433706
4.66099	0.628823	2.19612	0.482225
3.11888	0.596136	1.06896	0.409085
2.94082	0.658952	4.33281	0.574505
7.82524	0.711356	1.42989	0.390672
4.4563	0.649455	0.956373	0.29205
5.43567	0.689757	3.11315	0.536866
1.46943	0.527435	5.2998	0.576958
0.919014	0.490475	3.53905	0.617513
1.56148	0.573222	1.7885	0.493245
2.23293	0.630109	1.06657	0.409858
1.20032	0.525474	1.97371	0.433044
2.74639	0.695175	1.75034	0.471328
1.72653	0.510214	2.08238	0.575158
2.75612	0.614275	1.12641	0.430148
2.36858	0.604572	1.56555	0.554744
2.09367	0.541134	1.83247	0.464733
3.322	0.660457	1.2839	0.503909
2.31995	0.623675	0.84537	0.404953
1.39243	0.553053	1.52975	0.585317
1.54425	0.580878	1.67902	0.490319
3.75101	0.660715	1.35769	0.418092
1.38048	0.578124	1.83386	0.424679
1.26189	0.525588	1.47808	0.452306
3.42006	0.674724	2.38573	0.565635
3.48335	0.663535	1.81641	0.505096
3.0759	0.663552	1.63598	0.499495
2.11275	0.637793	1.62857	0.416014
3.22056	0.604367	1.90005	0.500995
1.53307	0.533759	1.99138	0.384852
1.56311	0.670209	3.4027	0.557932
1.19126	0.548412	1.26037	0.464643
1.89904	0.696307	1.89837	0.454618
1.75034	0.585857	1.10182	0.412896
2.20509	0.662029	1.00825	0.381047
1.85321	0.583368	2.05869	0.460587
1.17836	0.484262	2.09306	0.507508
4.01542	0.677989	4.23693	0.566894
1.11618	0.470603	3.24558	0.576179
2.03598	0.643752	2.73757	0.521351
2.16457	0.501091	1.34874	0.412482
2.2756	0.611386	1.07431	0.446132
4.36984	0.648415	1.38187	0.395896
1.25784	0.540397	2.6647	0.554326
3.31989	0.612147	3.41111	0.584628
2.23464	0.641386	1.94642	0.44542
4.08555	0.502199	1.66033	0.461784
5.37095	0.675244	1.20191	0.430669
3.40532	0.698695	1.60731	0.496523
4.65128	0.673539	1.95653	0.411444
5.41159	0.684006	2.06271	0.477805
5.32055	0.677502	4.61181	0.625452
5.04817	0.708658	1.84253	0.443093
4.47085	0.606883	1.55944	0.453407
1.24512	0.487874	2.10761	0.488491
1.74049	0.522093	1.32588	0.447214
1.34969	0.527764	3.1439	0.52168
1.3511	0.494974	0.855108	0.305059
1.62308	0.56951	0.929351	0.347953
7.50032	0.68058	1.58536	0.460722
5.98257	0.668743	4.29219	0.607689
4.30523	0.618671	2.50757	0.563788
1.49394	0.564296	4.25942	0.607755
1.84495	0.577711	1.79596	0.479533
6.19513	0.680296	3.68695	0.567851
8.33594	0.69314	2.98233	0.547832
3.07175	0.626537	3.03105	0.461411
6.66247	0.677665	3.386	0.566815
3.39745	0.644718	2.96626	0.493792
3.80998	0.659274	5.02985	0.620048
6.8941	0.713713	1.57852	0.356922
3.61561	0.621412	2.07072	0.469841
6.97795	0.716523	1.78136	0.465858
3.92899	0.547068	2.64407	0.563033
3.0182	0.656816	1.90908	0.464835
3.69093	0.575408	1.70984	0.454235
2.335	0.628039	1.60056	0.550868
1.67065	0.494722	1.88051	0.463872
1.86281	0.548842	1.52933	0.462829
5.59162	0.65485	1.44804	0.460736
1.96011	0.566528	1.69826	0.479181
2.69181	0.613486	1.18429	0.460807
2.78371	0.639421	3.08107	0.504247
2.70809	0.543463	2.74709	0.537106
2.02815	0.532957	2.24233	0.545338
1.42006	0.54906	2.25309	0.528022
1.15488	0.605782	2.13792	0.599749
1.50498	0.52491	4.1925	0.580628
1.25531	0.543283	1.15268	0.489749
1.92271	0.515676	1.27843	0.491178
1.88963	0.545373	1.36471	0.423255
1.32155	0.506744	1.68205	0.392906
1.4097	0.511181	1.67484	0.471523
1.51174	0.544905	0.919706	0.454458
2.81443	0.566447	0.919706	0.40677
1.75107	0.480139	1.08258	0.368203
1.47117	0.599329	1.41826	0.446423
1.20931	0.496392	1.87746	0.486558
4.2273	0.656592	1.26793	0.483215
1.11618	0.373624	1.33784	0.458857
2.68328	0.620262	1.0295	0.427665
1.43921	0.571407	1.94347	0.47353
5.79127	0.716881	3.01166	0.592013
0.913452	0.364463	4.43222	0.662378
3.11172	0.587686	3.10516	0.55113
2.31087	0.573532	0.796489	0.33215
3.27974	0.582888	1.86247	0.485631
2.21115	0.575752	3.50868	0.613727
2.31032	0.572744	2.69252	0.567786
2.55463	0.585522	1.44142	0.492105
2.43043	0.60853	2.05591	0.470084
1.64026	0.523655	1.04241	0.476681
1.04119	0.472176	1.48538	0.46105
0.97157	0.42215	1.78065	0.577273
2.69158	0.642814	2.3183	0.65859
2.59691	0.583462	1.16859	0.506964
2.1839	0.500251	1.79419	0.597724
1.22708	0.458729	1.64723	0.507409
3.51955	0.675556	2.61451	0.542065
3.52823	0.658423	1.91906	0.551881
3.45748	0.618722	3.16711	0.593898
1.84184	0.565953	2.82888	0.514474
1.44054	0.57812	3.02874	0.608248
2.32516	0.678788	4.72384	0.630568
2.23407	0.598471	2.33691	0.540877
1.33736	0.449073	1.39014	0.488272
1.6775	0.574497	1.35956	0.469592
5.42816	0.661892	2.09883	0.535098
1.69863	0.59785	2.74662	0.486169
2.69016	0.495989	1.54301	0.483832
1.24665	0.493421	1.21088	0.468273
1.31721	0.507364	1.66454	0.519988
3.19175	0.642372	1.4223	0.477696
1.30408	0.521382	2.49075	0.582476
1.25226	0.571197	1.6422	0.49661
1.72542	0.51469	1.48152	0.469967
1.97242	0.529081	1.96919	0.5371
1.52933	0.593348	2.11455	0.474768
1.1762	0.534171	5.45146	0.62552
2.72918	0.59233	1.88355	0.565722
1.25632	0.563353	2.47149	0.561788
2.68447	0.42532	1.46727	0.383399
2.36455	0.592601	3.6961	0.60603
2.32653	0.541682	1.41196	0.397113
1.05818	0.476953	3.50032	0.500495
1.81466	0.52924	4.00064	0.504028
2.63828	0.604372	1.83004	0.497031
1.94838	0.594664	2.09792	0.464691
2.94082	0.6434	1.57124	0.482399
3.34797	0.642863	1.469	0.460451
1.06238	0.46379	1.18214	0.371654
2.10641	0.570565	1.98305	0.511847
2.1409	0.61249	1.16805	0.398212
2.65248	0.561478	1.47549	0.474922
2.45079	0.567409	0.982004	0.490611
3.82982	0.705561	2.0187	0.468589
1.37355	0.615366	1.10298	0.439237
2.4422	0.607965	3.65973	0.58344
1.37632	0.463892	1.27544	0.499073
1.05275	0.462512	1.53722	0.425724
1.64181	0.540131	0.824003	0.388027
2.58733	0.627402	1.67218	0.449927
2.06487	0.600718	1.46161	0.447801
1.01329	0.452407	3.42936	0.584734
4.09069	0.640483	3.16107	0.533775
2.18069	0.569868	3.68505	0.564707
4.24744	0.677529	1.74852	0.430947
5.24228	0.645835	2.76304	0.509416
1.99554	0.516277	6.90675	0.617645
2.2146	0.610315	1.50836	0.462346
3.76643	0.635545	1.32684	0.424451
1.10701	0.470103	1.12357	0.370432
1.23278	0.513522	4.49487	0.584136
1.82237	0.583844	3.93385	0.601423
3.48811	0.61549	2.78417	0.510555
1.43833	0.565018	1.45199	0.458053
3.49868	0.666486	1.50836	0.474964
1.41961	0.535006	2.77592	0.495455
2.23948	0.551163	3.14552	0.463884
4.93357	0.598138	3.13049	0.487036
1.702	0.495686	1.5426	0.490507
1.33163	0.515166	2.63562	0.518977
1.10586	0.475663	2.22951	0.54654
1.68697	0.54167	1.71913	0.599416
1.69149	0.565394	1.87915	0.497983
1.437	0.492536	1.14324	0.420446
1.44142	0.431174	1.49607	0.48622
1.65879	0.642039	6.99672	0.619518
2.76903	0.620757	1.23742	0.465966
2.18885	0.566557	1.50625	0.523692
3.19315	0.662178	1.49394	0.489797
0.987179	0.382894	1.78279	0.527311
1.27394	0.58155	1.46205	0.377964
2.00286	0.557245	4.65073	0.553432
		3.13761	0.531874
		2.98894	0.545831
		1.90072	0.497702
		2.1061	0.454719
		4.84604	0.545486
		1.58013	0.504067
		2.18332	0.425781
		2.04659	0.542938
		1.41061	0.365742
		2.6592	0.507719
		2.7665	0.503108
		2.01712	0.368706
		2.08544	0.512283
		1.62073	0.439049
		4.9315	0.54335
		3.27138	0.490685
		3.16349	0.421546
		2.46814	0.415937
		1.1281	0.427082
		2.23607	0.442968
		3.23082	0.495984
		2.54788	0.44579
		1.81466	0.413179
		2.80036	0.556134
		1.86007	0.488589
		1.97758	0.595746
		1.37817	0.470127
		4.33252	0.496595
		3.43567	0.477584
		1.36797	0.396056
		1.1675	0.523524
		1.98048	0.543433
		3.057	0.437511
		3.22233	0.47823
		4.27316	0.486109
		1.76122	0.494323
		1.34874	0.495424

## Sheet: F6G
	Genotype
g-ratio	SptbF/FSptbn4F/F	Avil-cre; SptbF/FSptbn4F/F
	0.621608	0.466717
	0.593938	0.49599
	0.563709	0.488929
N (Animal)	3	3
Total axons counted	266	303
Mean	0.5931	0.4839
Std. Deviation	0.02896	0.01528
Std. Error of Mean	0.01672	0.00882
Unpaired t test
P value	0.0045
P value summary	**
Significantly different? (P < 0.05)	Yes
One- or two-tailed P value?	Two-tailed
t, df	t=5.777 df=4

## Sheet: F6H
	Relative percentage (%)
Axon diameter	SptbF/FSptbn4F/F	Avil-cre; SptbF/FSptbn4F/F
1	1.9	4.3
2	38	49.8
3	30.1	22.1
4	16.5	13.9
5	6.8	5.6
6	3.8	2.3
7	1.5	1.7
8	1.1	0.3
9	0.4	0

## Sheet: F6I
	Genotype			Axon diameter
Axon diameter	SptbF/FSptbn4F/F	Avil-cre; SptbF/FSptbn4F/F		SptbF/FSptbn4F/F	Avil-cre; SptbF/FSptbn4F/F
N (Animal)	3	3		3.32775	6.86819
Total axons counted	266	303		2.81782	1.60016
25% Percentile	1.527	1.441		1.83837	1.33831
Median	2.331	1.9		2.45754	1.88524
75% Percentile	3.285	2.959		1.61482	2.95896
Mean	2.621	2.287		1.46161	3.97332
Std. Deviation	1.391	1.21		4.49543	0.833991
Std. Error of Mean	0.08531	0.0695		7.92922	1.38601
				4.80101	0.974189
Unpaired t test				3.26709	2.18769
P value	0.0023			1.36471	3.30951
P value summary	**			4.26719	2.22608
Significantly different? (P < 0.05)	Yes			3.89169	1.16422
One- or two-tailed P value?	Two-tailed			2.92039	2.76696
t, df	t=3.068 df=567			4.15894	2.00572
				4.28045	2.4194
				2.95163	2.79923
				2.71772	1.58094
				2.71373	2.72871
				2.85711	1.10701
				3.07569	2.14417
				1.02516	4.13298
				2.71185	7.41637
				1.98466	1.41916
				3.12214	1.5761
				2.8649	2.3205
				2.76212	2.44246
				1.5426	5.04414
				2.09062	1.87236
				2.5893	1.51174
				2.42098	0.982652
				2.46556	5.12108
				3.78969	2.11636
				1.33689	2.05125
				2.44663	1.40382
				3.9421	5.4538
				3.50614	1.06777
				1.79419	3.16731
				2.62375	4.10701
				3.60219	6.06367
				3.01863	3.31682
				1.60294	3.67293
				3.76677	1.12867
				1.45725	1.09545
				1.65225	1.24971
				1.50794	1.65225
				2.34697	3.53869
				4.59396	2.23036
				2.8336	1.41826
				2.44246	2.75172
				2.45624	5.02034
				1.22656	3.11745
				2.60988	3.51031
				2.55637	1.50836
				0.87717	1.0479
				2.76327	3.32526
				3.73586	3.49303
				3.30219	2.08146
				2.69158	2.76995
				1.00508	3.06926
				2.63586	0.934137
				3.82283	6.25804
				2.85331	2.29899
				2.96584	1.2177
				2.49126	1.33498
				3.09695	2.25281
				1.36843	1.19393
				1.19979	1.0479
				2.76373	1.6453
				3.95983	1.34638
				2.24403	1.87202
				1.35393	1.06478
				1.52056	1.70051
				4.66099	2.19612
				3.11888	1.06896
				2.94082	4.33281
				7.82524	1.42989
				4.4563	0.956373
				5.43567	3.11315
				1.46943	5.2998
				0.919014	3.53905
				1.56148	1.7885
				2.23293	1.06657
				1.20032	1.97371
				2.74639	1.75034
				1.72653	2.08238
				2.75612	1.12641
				2.36858	1.56555
				2.09367	1.83247
				3.322	1.2839
				2.31995	0.84537
				1.39243	1.52975
				1.54425	1.67902
				3.75101	1.35769
				1.38048	1.83386
				1.26189	1.47808
				3.42006	2.38573
				3.48335	1.81641
				3.0759	1.63598
				2.11275	1.62857
				3.22056	1.90005
				1.53307	1.99138
				1.56311	3.4027
				1.19126	1.26037
				1.89904	1.89837
				1.75034	1.10182
				2.20509	1.00825
				1.85321	2.05869
				1.17836	2.09306
				4.01542	4.23693
				1.11618	3.24558
				2.03598	2.73757
				2.16457	1.34874
				2.2756	1.07431
				4.36984	1.38187
				1.25784	2.6647
				3.31989	3.41111
				2.23464	1.94642
				4.08555	1.66033
				5.37095	1.20191
				3.40532	1.60731
				4.65128	1.95653
				5.41159	2.06271
				5.32055	4.61181
				5.04817	1.84253
				4.47085	1.55944
				1.24512	2.10761
				1.74049	1.32588
				1.34969	3.1439
				1.3511	0.855108
				1.62308	0.929351
				7.50032	1.58536
				5.98257	4.29219
				4.30523	2.50757
				1.49394	4.25942
				1.84495	1.79596
				6.19513	3.68695
				8.33594	2.98233
				3.07175	3.03105
				6.66247	3.386
				3.39745	2.96626
				3.80998	5.02985
				6.8941	1.57852
				3.61561	2.07072
				6.97795	1.78136
				3.92899	2.64407
				3.0182	1.90908
				3.69093	1.70984
				2.335	1.60056
				1.67065	1.88051
				1.86281	1.52933
				5.59162	1.44804
				1.96011	1.69826
				2.69181	1.18429
				2.78371	3.08107
				2.70809	2.74709
				2.02815	2.24233
				1.42006	2.25309
				1.15488	2.13792
				1.50498	4.1925
				1.25531	1.15268
				1.92271	1.27843
				1.88963	1.36471
				1.32155	1.68205
				1.4097	1.67484
				1.51174	0.919706
				2.81443	0.919706
				1.75107	1.08258
				1.47117	1.41826
				1.20931	1.87746
				4.2273	1.26793
				1.11618	1.33784
				2.68328	1.0295
				1.43921	1.94347
				5.79127	3.01166
				0.913452	4.43222
				3.11172	3.10516
				2.31087	0.796489
				3.27974	1.86247
				2.21115	3.50868
				2.31032	2.69252
				2.55463	1.44142
				2.43043	2.05591
				1.64026	1.04241
				1.04119	1.48538
				0.97157	1.78065
				2.69158	2.3183
				2.59691	1.16859
				2.1839	1.79419
				1.22708	1.64723
				3.51955	2.61451
				3.52823	1.91906
				3.45748	3.16711
				1.84184	2.82888
				1.44054	3.02874
				2.32516	4.72384
				2.23407	2.33691
				1.33736	1.39014
				1.6775	1.35956
				5.42816	2.09883
				1.69863	2.74662
				2.69016	1.54301
				1.24665	1.21088
				1.31721	1.66454
				3.19175	1.4223
				1.30408	2.49075
				1.25226	1.6422
				1.72542	1.48152
				1.97242	1.96919
				1.52933	2.11455
				1.1762	5.45146
				2.72918	1.88355
				1.25632	2.47149
				2.68447	1.46727
				2.36455	3.6961
				2.32653	1.41196
				1.05818	3.50032
				1.81466	4.00064
				2.63828	1.83004
				1.94838	2.09792
				2.94082	1.57124
				3.34797	1.469
				1.06238	1.18214
				2.10641	1.98305
				2.1409	1.16805
				2.65248	1.47549
				2.45079	0.982004
				3.82982	2.0187
				1.37355	1.10298
				2.4422	3.65973
				1.37632	1.27544
				1.05275	1.53722
				1.64181	0.824003
				2.58733	1.67218
				2.06487	1.46161
				1.01329	3.42936
				4.09069	3.16107
				2.18069	3.68505
				4.24744	1.74852
				5.24228	2.76304
				1.99554	6.90675
				2.2146	1.50836
				3.76643	1.32684
				1.10701	1.12357
				1.23278	4.49487
				1.82237	3.93385
				3.48811	2.78417
				1.43833	1.45199
				3.49868	1.50836
				1.41961	2.77592
				2.23948	3.14552
				4.93357	3.13049
				1.702	1.5426
				1.33163	2.63562
				1.10586	2.22951
				1.68697	1.71913
				1.69149	1.87915
				1.437	1.14324
				1.44142	1.49607
				1.65879	6.99672
				2.76903	1.23742
				2.18885	1.50625
				3.19315	1.49394
				0.987179	1.78279
				1.27394	1.46205
				2.00286	4.65073
					3.13761
					2.98894
					1.90072
					2.1061
					4.84604
					1.58013
					2.18332
					2.04659
					1.41061
					2.6592
					2.7665
					2.01712
					2.08544
					1.62073
					4.9315
					3.27138
					3.16349
					2.46814
					1.1281
					2.23607
					3.23082
					2.54788
					1.81466
					2.80036
					1.86007
					1.97758
					1.37817
					4.33252
					3.43567
					1.36797
					1.1675
					1.98048
					3.057
					3.22233
					4.27316
					1.76122
					1.34874
